# Supplementary material
Source: publisher figshare collection journal article supplement (https://acs.figshare.com/ndownloader/files/28457091)
Supplement: Supplementary file 1 [file 28457091]

**Supporting Information**

# Anionic Polyelectrolyte-Induced Aggregation of Basic Orange 21: A Clue toward Metachromasia

*Gaurav Singh<sup>a</sup>, Shrishti P. Pandey<sup>b,c</sup> and Prabhat K. Singh<sup>c,d,\*</sup>*

<sup>a</sup>UM-DAE Centre for Excellence in Basic Sciences, University of Mumbai, Kalina, Santacruz  
(E), Mumbai 400098, India

<sup>b</sup>Amity Institute of Biotechnology, Amity University, Mumbai-Pune Expressway, Bhatan,  
Panvel, Mumbai, 410206, INDIA

<sup>c</sup>Radiation & Photochemistry Division, Bhabha Atomic Research Centre, Mumbai 400085, India

<sup>d</sup>Homi Bhabha National Institute, Training School Complex, Anushaktinagar, Mumbai, 400094,  
India

\*Authors for correspondence: Email: prabhatk@barc.gov.in; prabhatsingh988@gmail.com

Tel. 91-22-25590894, Fax: 91-22-5505151

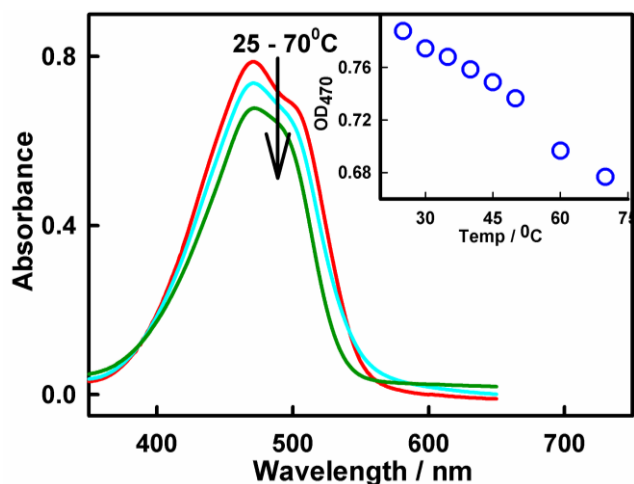

**Figure S1:** Ground-state absorption spectra of BO21 in PSS (0.35  $\mu\text{M}$ ) at different temperature, 25  $^{\circ}\text{C}$  (red line), 50  $^{\circ}\text{C}$  (light blue line) and 70  $^{\circ}\text{C}$  (green line). Inset: variation of absorbance at 470 nm with increase in the temperature

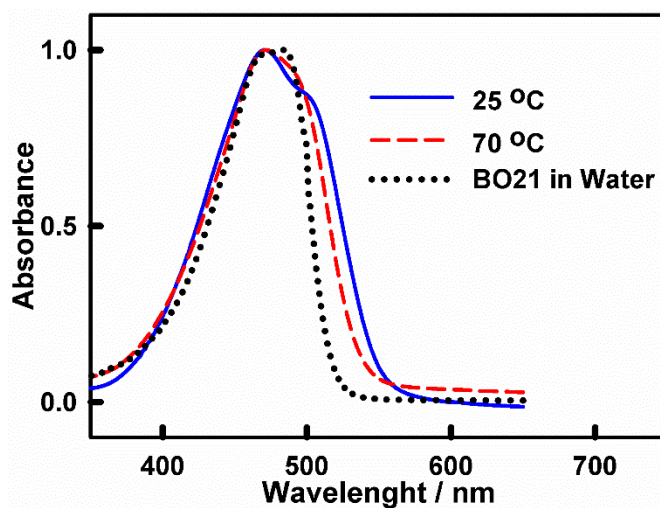

**Figure S2:** Normalized ground-state absorption spectra of BO21 in PSS (0.35  $\mu\text{M}$ ) at different temperature, 25  $^{\circ}\text{C}$  (solid blue) and 70  $^{\circ}\text{C}$  (dashed red line). The dotted black line represents the normalised absorption spectrum of BO21 in water.
